# Supplementary material
Source: PubMed Central journal article supplement (PMC5528573)
Supplement: MOL2-8-1196-s002.pdf [file MOL2-8-1196-s002.pdf]

**Supplementary Table S10: Multivariate Cox regression models among 1265 ER positive cancers from dataset pools #1 and #2 combined**

| <b>Parameter</b>      |                       | <b>n=</b>   | <b>HR</b> | <b>95% CI</b> | <b>P-Value</b>   |
|-----------------------|-----------------------|-------------|-----------|---------------|------------------|
| OPG                   | high vs. low          | 671 vs. 594 | 0.67      | 0.53-0.84     | <b>&lt;0.001</b> |
| PgR                   | positive vs. negative | 952 vs. 313 | 0.79      | 0.63-0.99     | <b>0.041</b>     |
| Subtype (Hugh et al.) | Luminal A vs B        | 711 vs. 554 | 0.45      | 0.35-0.56     | <b>&lt;0.001</b> |
| Age                   | > 50 vs. ≤ 50         | 864 vs. 401 | 0.91      | 0.73-.13      | 0.400            |
| Lymph node status     | LNN vs. N1            | 903 vs. 362 | 0.81      | 0.64-1.01     | 0.808            |
| Grading               | G3 vs. G1/G2          | 385 vs. 880 | 1.31      | 1.05-1.63     | <b>0.016</b>     |
| HER2                  | positive vs. negative | 93 vs. 1172 | 1.04      | 0.74-1.47     | 0.825            |
