# Supplementary material
Source: PubMed Central journal article supplement (PMC5528573)
Supplement: MOL2-8-1196-s003.pdf [file MOL2-8-1196-s003.pdf]

**Supplementary Table S11: Multivariate Cox regression models among 882 ER positive cancers from dataset pool #1 with Ki67 as continuous parameter\***

| <b>Parameter</b> |                       | <b>n=</b>   | <b>HR</b> | <b>95% CI</b> | <b>P-Value</b>   |
|------------------|-----------------------|-------------|-----------|---------------|------------------|
| OPG              | high vs. low          | 418 vs. 464 | 0.62      | 0.46-0.83     | <b>&lt;0.001</b> |
| PgR              | positive vs. negative | 655 vs. 227 | 0.60      | 0.46-0.78     | <b>0.041</b>     |
| Ki67 expression  | continuous            | 882         | n.a.      | n.a.          | <b>&lt;0.001</b> |

*\* The same analysis was performed as in Table 2 Model 3, including 882 ER positive cancers, with the exception that Ki67 expression was not binary stratified into high or low expression (Luminal B vs. Luminal A) but used as continuous value from microarray.*
