# Supplementary material
Source: PubMed Central journal article supplement (PMC5528573)
Supplement: MOL2-8-1196-s004.pdf [file MOL2-8-1196-s004.pdf]

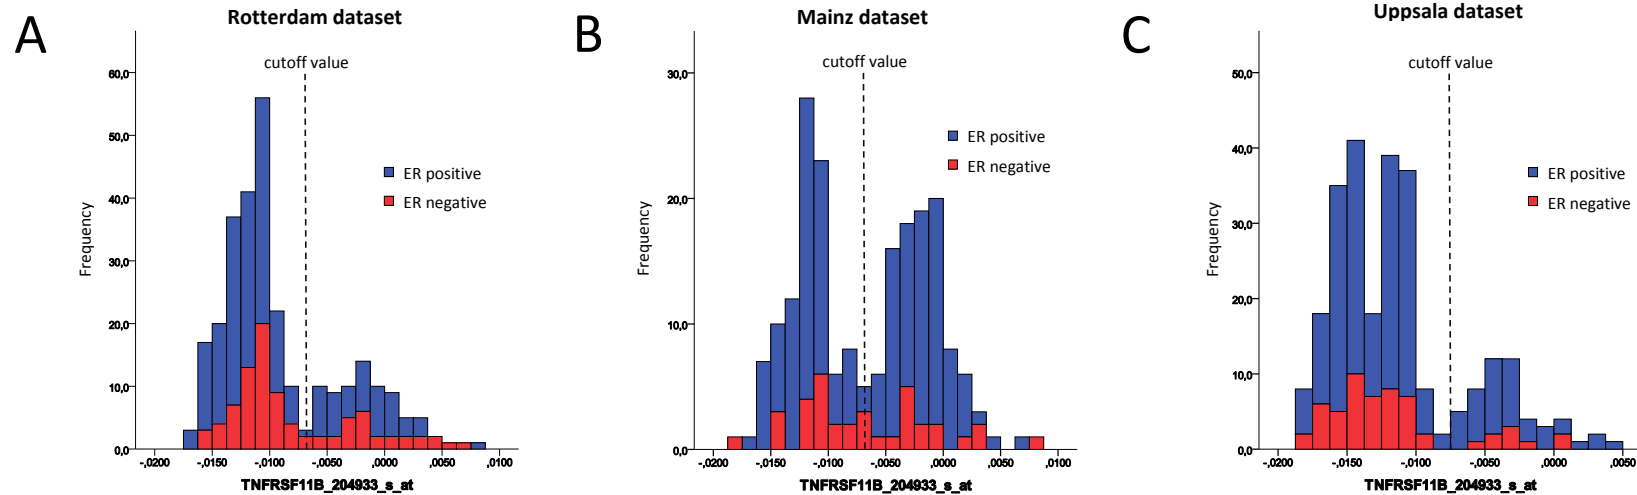

### Supplementary Figure S1: Bimodal distribution of OPG expression values

Histogram of normalized OPG (TNFRSF11B) mRNA expression values according to Affymetrix probeset 204933\_s\_at among 286 breast cancer samples of the Rotterdam dataset (Wang et al. 2005; Lancet 365, 671–679) is given in Panel A. Colouring according to ER status (blue: ER positive; red: ER negative) demonstrates that the bimodal shape of the distribution did not originate from subtype composition. A dashed line represents the cutoff for OPG gene expression derived from the distribution. Panels B and C demonstrate the same analyses for the datasets Mainz and Uppsala, respectively. The cutoff derived from the Rotterdam dataset in (A) is shown to also separate the bimodal peaks in those datasets.
