# Supplementary material
Source: PubMed Central journal article supplement (PMC5528573)
Supplement: MOL2-8-1196-s005.pdf [file MOL2-8-1196-s005.pdf]

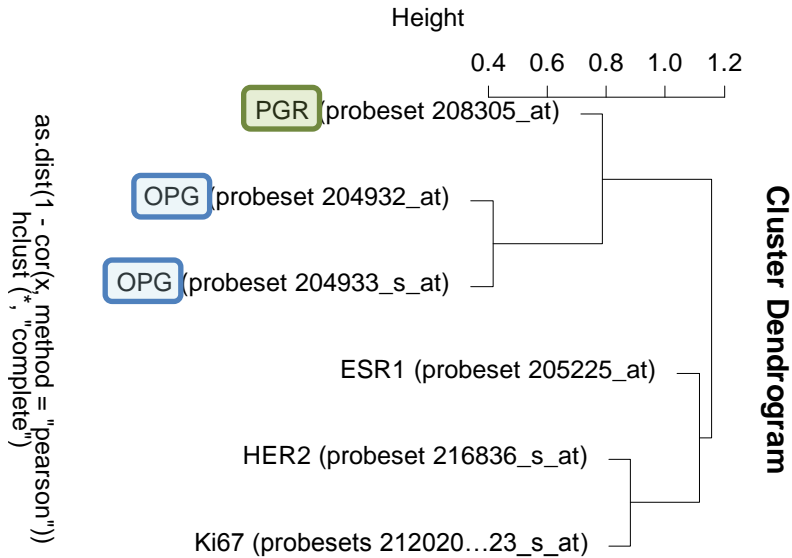

### Supplementary Figure S2: Correlation analysis of OPG and other genes as continuous variables

The correlation of gene expression values of OPG, estrogen receptor (ESR1), progesterone receptor (PGR), Ki67, and HER2 as continuous factors was analyzed in the dataset of 2990 ER positive tumors. Hierarchical clustering was performed to visualize the relationship of all parameters. The two OPG probesets cluster in the same branch of the dendrogram as PGR.
