# Supplementary material
Source: PubMed Central journal article supplement (PMC5528573)
Supplement: MOL2-8-1196-s007.pdf [file MOL2-8-1196-s007.pdf]

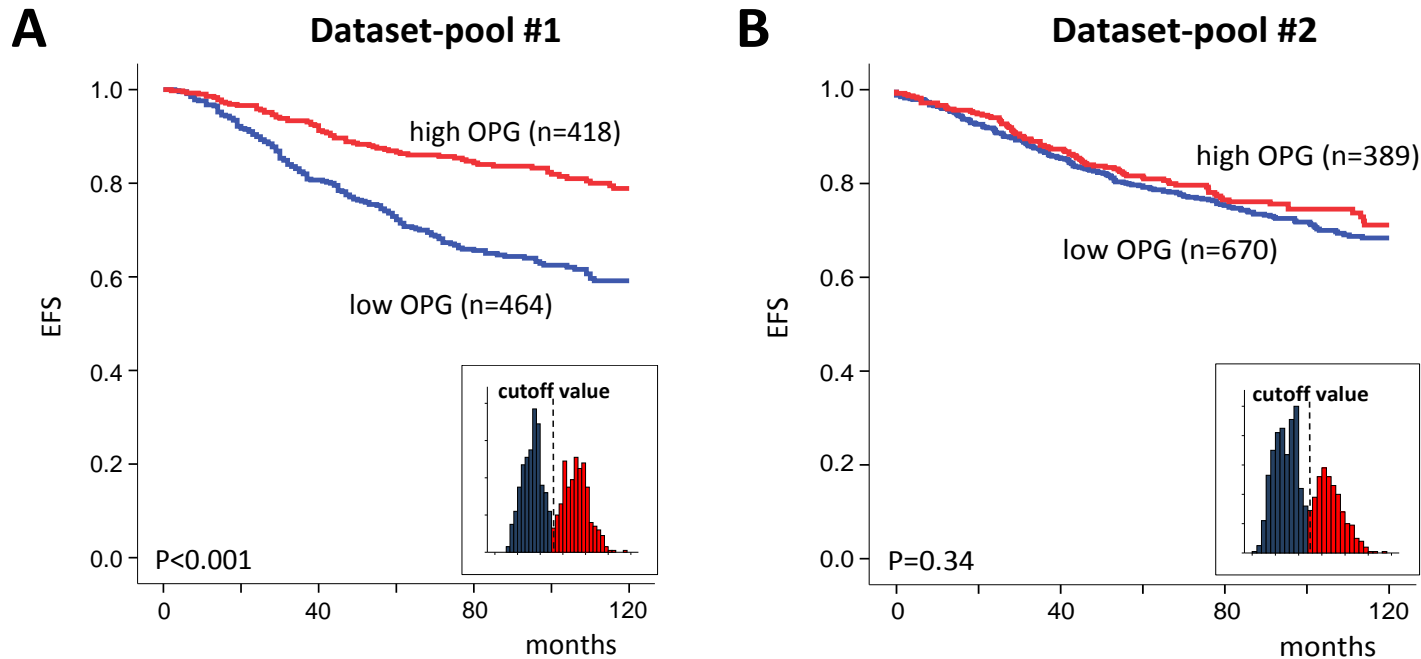

**Supplementary Figure S4: Illustration of the effect of dataset composition on the prognostic value of OPG expression**

Kaplan-Meier analysis was performed in two arbitrarily defined dataset pools: In Panel (A) the 882 ER positive patients from the seven datasets in which a prognostic value of OPG was detected (see Supplementary Table S3) were combined as dataset-pool #1. In Panel (B) all 1059 ER positive patients from the 11 datasets in which no prognostic value of OPG has been detected were combined as dataset-pool #2. The Kaplan-Meier graphs display the differences of event free survival according to OPG expression in these two voluntarily combined datasets for an illustrative purpose only.
