# Supplementary material
Source: PubMed Central journal article supplement (PMC5528573)
Supplement: MOL2-8-1196-s008.pdf [file MOL2-8-1196-s008.pdf]

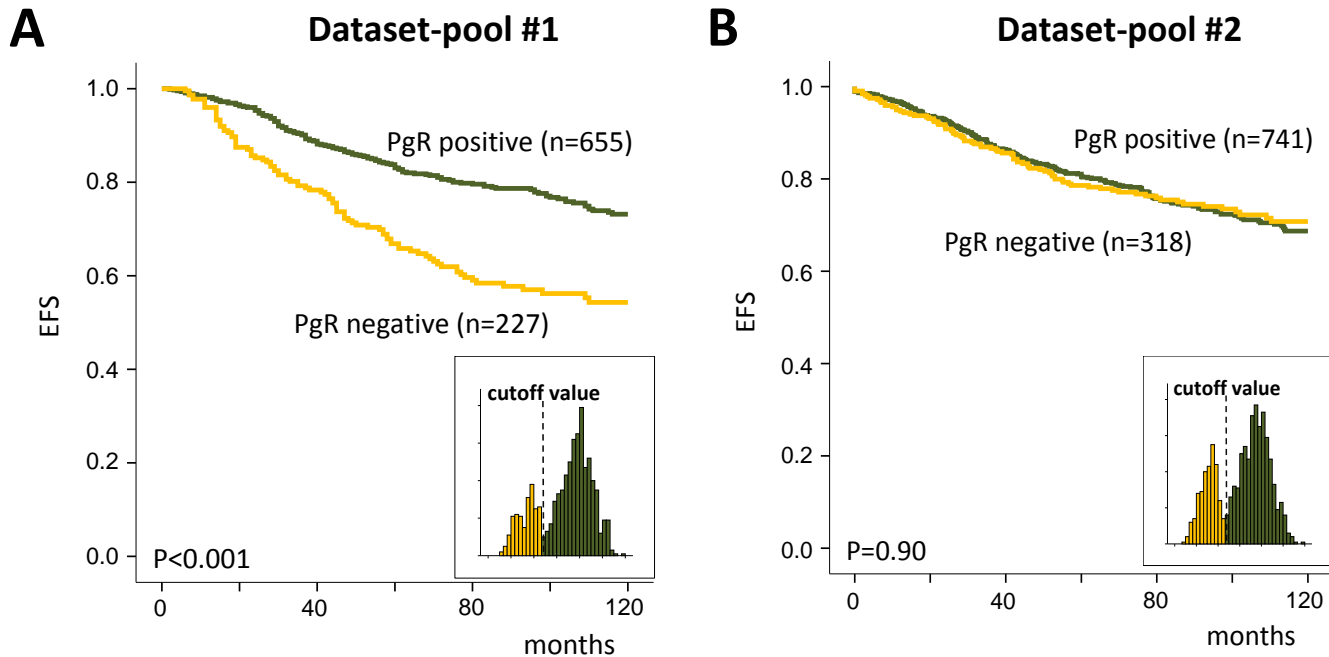

**Supplementary Figure S5: Illustration of the effect of dataset composition on the prognostic value of PgR expression**

Kaplan-Meier analysis was performed in two arbitrarily defined dataset pools: In Panel (A) the 882 ER positive patients from the seven datasets in which a prognostic value of OPG was detected (see Supplementary Table S3) were combined as dataset-pool #1. In Panel (B) all 1059 ER positive patients from the 11 datasets in which no prognostic value of OPG has been detected were combined as dataset-pool #2. The Kaplan-Meier graphs display the differences of event free survival according to PgR expression in these two voluntarily combined datasets. The two small inset graphs display the bimodal distribution of PgR expression and the applied cutoff value for PgR positivity.
