# Supplementary material
Source: PubMed Central journal article supplement (PMC5528573)
Supplement: MOL2-8-1196-s011.pdf [file MOL2-8-1196-s011.pdf]

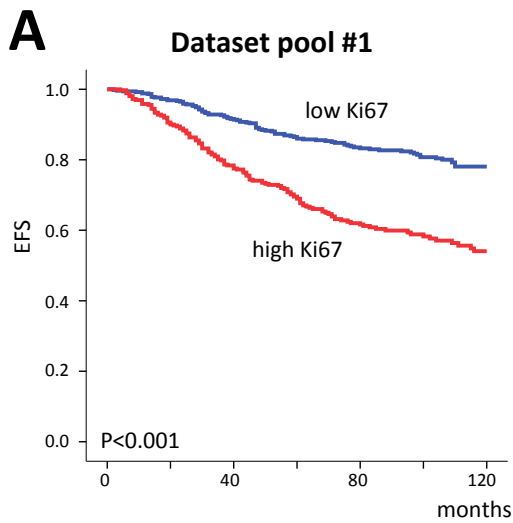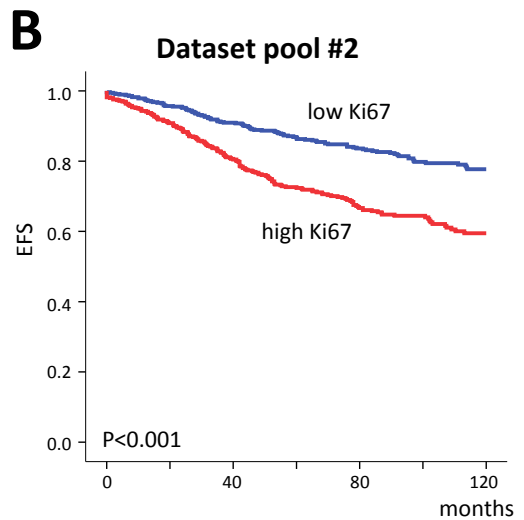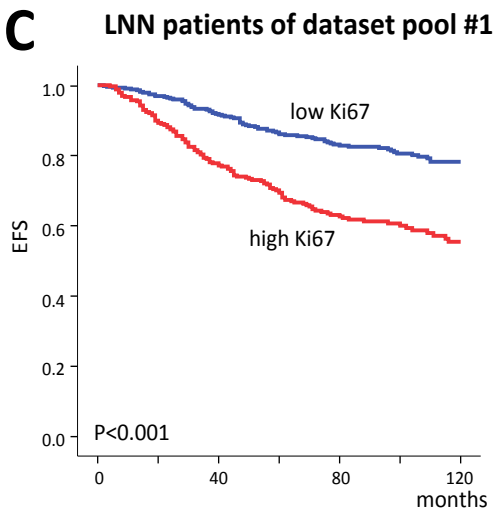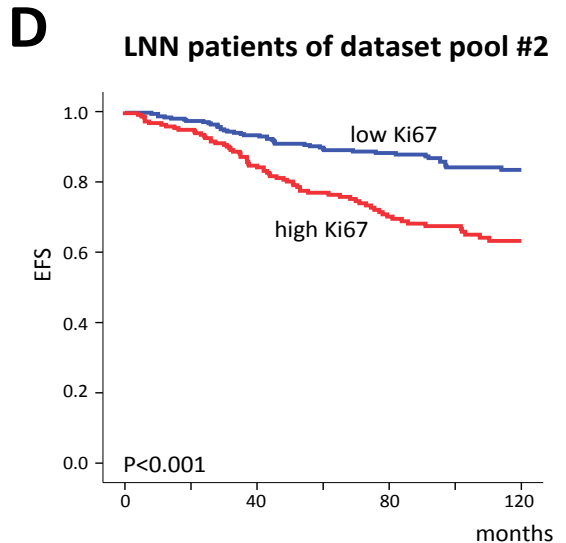

**Supplementary Figure S8: Verification of the prognostic value of Ki67 in both dataset pools**

Kaplan-Meier analysis according to Ki67 expression was performed in the same dataset pool #1 (A, n=882) and dataset pool #2 (B, n=1059) that were used for the Kaplan-Meier analyses of OPG and PgR in Supplementary Figures S4 and S5, respectively. Samples were stratified according to median Ki67 expression among all 2990 ER positive patients of the full cohort. In panels (C) and (D), the Kaplan-Meier analyses were restricted to the lymph node negative patients of dataset pool #1 (n=751) and dataset pool #2 (n=516), respectively.
