# Supplementary material
Source: PubMed Central journal article supplement (PMC5528573)
Supplement: MOL2-8-1196-s013.pdf [file MOL2-8-1196-s013.pdf]

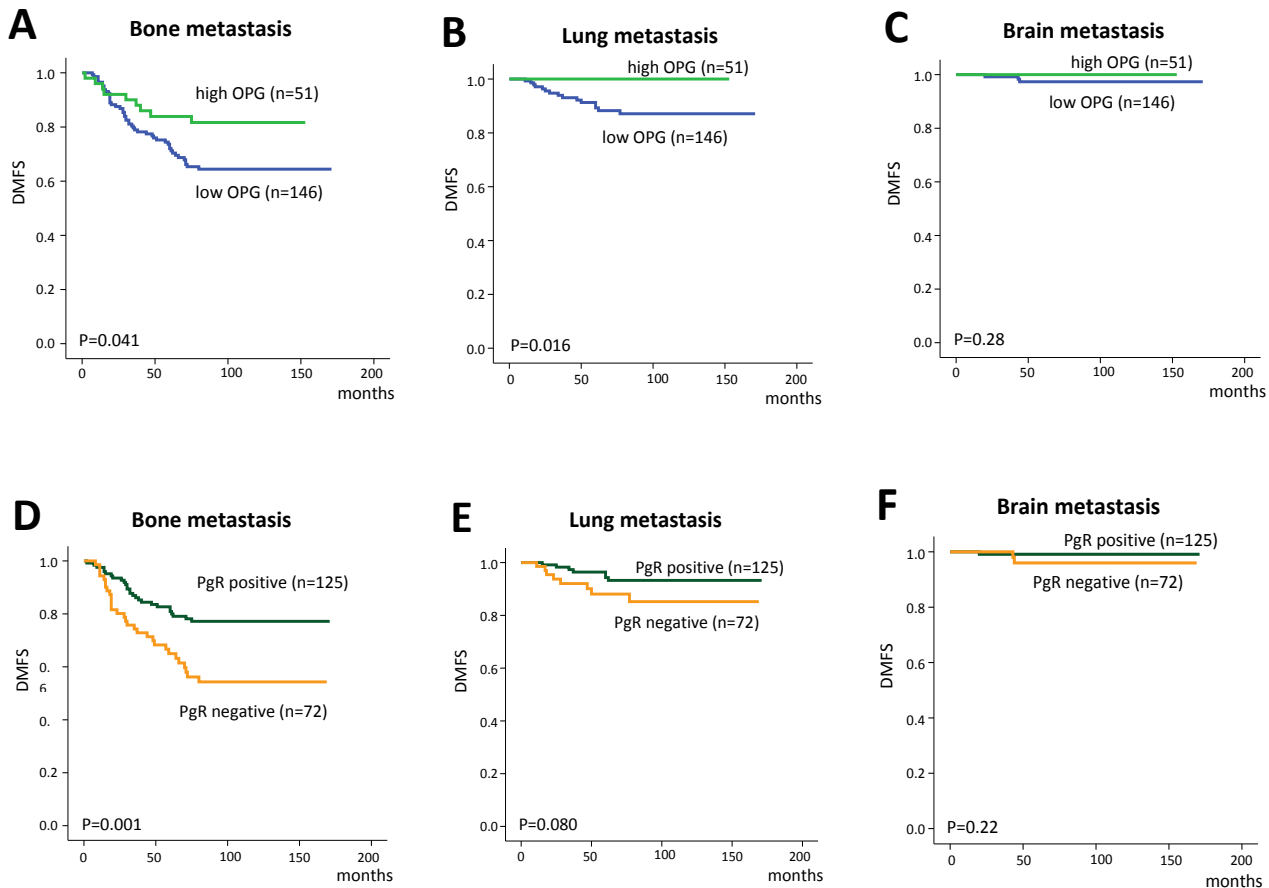

**Supplementary Figure S9: Prognostic value of OPG and PgR for different types of distant relapse**

Kaplan-Meier analysis according to OPG (A-C) and PgR (D-F) gene expression was performed among 242 ER positive tumors from the Rotterdam dataset with information on either bone metastasis (A, D), lung metastasis (B, E), or brain metastasis (C, F). All patients are lymph node negative.
