# Supplementary material
Source: PubMed Central journal article supplement (PMC5528573)
Supplement: MOL2-8-1196-s014.pdf [file MOL2-8-1196-s014.pdf]

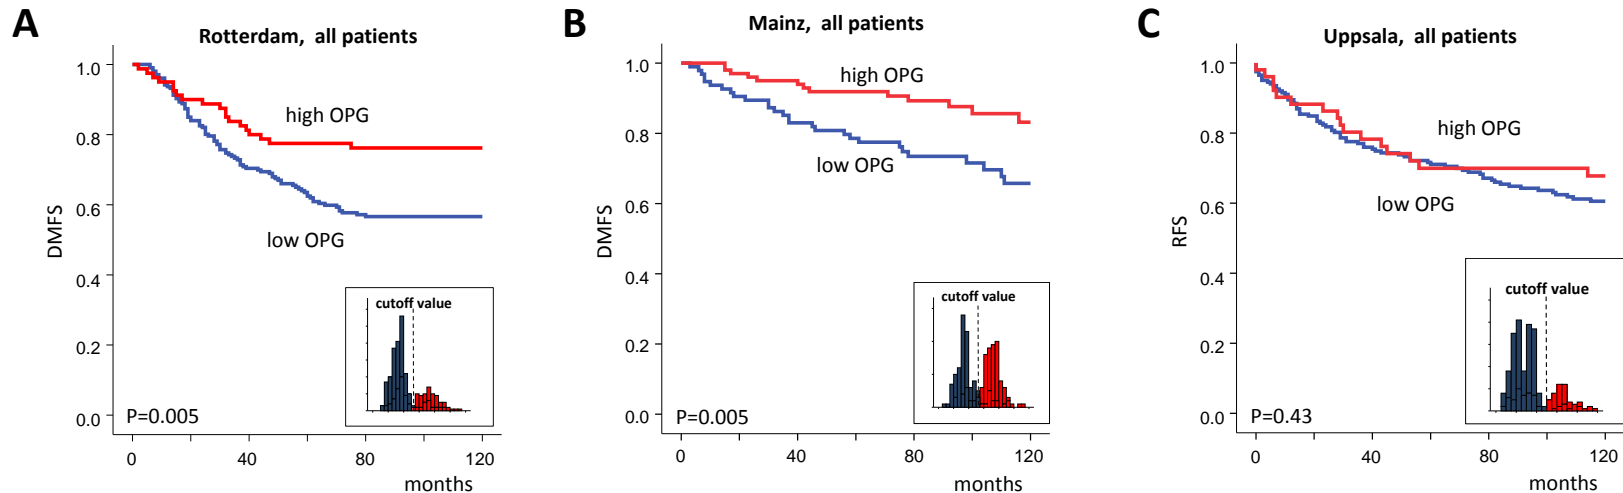

### Supplementary Figure S10: Prognostic value of OPG in different dataset.

Kaplan-Meier analysis of all patients in the Rotterdam dataset (A), the Mainz dataset (B), and the Uppsala dataset (C), according to OPG mRNA expression. OPG was dichotomized using the cutoff derived from its bimodal expression (Affymetrix probeset 204933\_s\_at). The same cutoff was used for validation the Mainz dataset (B) and Uppsala dataset (C), respectively. The small inset figures display the bimodal distribution of expression values and the applied cutoff.

***This figure analyzing mixed cohorts of ER positive and ER negative samples is included here only for completeness. Similar results were obtained when only the ER positive subsets of the cohorts were separately analyzed (see Figure 2 in the main manuscript).***
