# Supplementary material
Source: PubMed Central journal article supplement (PMC5528573)
Supplement: MOL2-8-1196-s016.pdf [file MOL2-8-1196-s016.pdf]

**Supplementary Table S3: Prognostic value of OPG in ER positive breast cancer among individual datasets and the respective dataset characteristics (sorted according to univariate HR)**

| prognostic effect | dataset          | HR Uni-Cox | 95% CI lower | 95% CI upper | P-Value | samples with follow up | % high OPG | type of adjuvant treatment | % without systemic therapy | % endocrine treatment | % chemotherapy | % Age up to 50 yr | % T1 | % LNN | % G3 | % Luminal-B (Hugh et al.) | % Pgr- negative | Array platform | Outcome (DMFS vs RFS) | % events at 5yr |
|-------------------|------------------|------------|--------------|--------------|---------|------------------------|------------|----------------------------|----------------------------|-----------------------|----------------|-------------------|------|-------|------|---------------------------|-----------------|----------------|-----------------------|-----------------|
| yes               | London           | 0.26       | 0.11         | 0.62         | 0.26    | 85                     | 78%        | endocrine                  | 0%                         | 100%                  | 0%             | 5%                | n.a. | 34%   | 22%  | 22%                       | 21%             | U133Plus       | RFS                   | 15%             |
| yes               | Mainz            | 0.34       | 0.15         | 0.78         | 0.34    | 164                    | 52%        | untreated                  | 100%                       | 0%                    | 0%             | 23%               | n.a. | 100%  | 9%   | 42%                       | 21%             | U133A          | DMFS                  | 12%             |
| yes               | BIG1-98          | 0.39       | 0.10         | 1.52         | 0.39    | 52                     | 83%        | mixed                      | 0%                         | 63%                   | 37%            | 6%                | n.a. | 38%   | 33%  | 19%                       | 21%             | U133Plus       | DMFS                  | 19%             |
| yes               | Rotterdam        | 0.47       | 0.25         | 0.86         | 0.47    | 208                    | 26%        | untreated                  | 100%                       | 0%                    | 0%             | 43%               | 56%  | 100%  | 63%  | 55%                       | 38%             | U133A          | DMFS                  | 30%             |
| yes               | TransBIG         | 0.47       | 0.27         | 0.81         | 0.47    | 132                    | 53%        | untreated                  | 100%                       | 0%                    | 0%             | 68%               | 6%   | 100%  | 25%  | 41%                       | 17%             | U133A          | RFS                   | 27%             |
| yes               | Oxford-Tamoxifen | 0.48       | 0.21         | 1.08         | 0.48    | 106                    | 41%        | endocrine                  | 0%                         | 100%                  | 0%             | 14%               | n.a. | 63%   | 17%  | 49%                       | 25%             | U133A          | RFS                   | 20%             |
| small             | Veridex-Tam      | 0.53       | 0.19         | 1.47         | 0.53    | 135                    | 41%        | endocrine                  | 0%                         | 100%                  | 0%             | n.a.              | n.a. | 100%  | n.a. | 44%                       | 27%             | U133A          | DMFS                  | 9%              |
| no                | Stockholm        | 0.74       | 0.28         | 1.96         | 0.74    | 122                    | 23%        | mixed                      | 11%                        | 61%                   | n.a.           | n.a.              | n.a. | n.a.  | 31%  | 62%                       | 43%             | U133A          | RFS                   | 19%             |
| no                | San Francisco    | 0.77       | 0.36         | 1.64         | 0.77    | 78                     | 50%        | chemo                      | 9%                         | 45%                   | 46%            | 44%               | 3%   | 44%   | 58%  | 53%                       | 32%             | U133A          | DMFS                  | 32%             |
| no                | Uppsala          | 0.79       | 0.43         | 1.43         | 0.79    | 199                    | 21%        | mixed                      | 57%                        | 31%                   | n.a.           | 18%               | n.a. | 67%   | 12%  | 45%                       | 30%             | U133A          | RFS                   | 26%             |
| no                | IPC              | 0.85       | 0.45         | 1.59         | 0.85    | 136                    | 64%        | n.a.                       | n.a.                       | n.a.                  | n.a.           | 34%               | 26%  | 43%   | 28%  | 46%                       | 12%             | U133Plus       | DMFS                  | 22%             |
| no                | Oxford-Untreated | 0.86       | 0.23         | 3.13         | 0.86    | 45                     | 27%        | untreated                  | 100%                       | 0%                    | 0%             | 42%               | 25%  | 100%  | 25%  | 56%                       | 24%             | U133A          | RFS                   | 18%             |
| no                | Boston_2         | 0.87       | 0.09         | 8.33         | 0.87    | 68                     | 78%        | chemo                      | 0%                         | 33%                   | 67%            | 49%               | n.a. | 47%   | 32%  | 29%                       | 25%             | U133Plus       | RFS                   | 6%              |
| no                | IPC_HER2         | 0.90       | 0.09         | 9.09         | 0.90    | 10                     | 80%        | n.a.                       | n.a.                       | n.a.                  | n.a.           | 30%               | 13%  | 22%   | 50%  | 80%                       | 50%             | U133Plus       | DMFS                  | 40%             |
| no                | New York         | 0.93       | 0.28         | 3.13         | 0.93    | 45                     | 36%        | chemo                      | 0%                         | 17%                   | 83%            | 40%               | n.a. | 29%   | n.a. | 69%                       | 40%             | U133A          | DMFS                  | 16%             |
| no                | SET2             | 1.02       | 0.45         | 2.27         | 1.02    | 183                    | 15%        | endocrine                  | 0%                         | 100%                  | 0%             | n.a.              | n.a. | 58%   | n.a. | 49%                       | 42%             | U133A          | RFS                   | 14%             |
| no                | London-2         | 1.03       | 0.33         | 3.23         | 1.03    | 73                     | 48%        | endocrine                  | 0%                         | 100%                  | 0%             | 5%                | n.a. | 52%   | 39%  | 32%                       | 16%             | U133Plus       | RFS                   | 11%             |
| no                | SET1             | 1.12       | 0.45         | 2.86         | 1.12    | 100                    | 41%        | endocrine                  | 0%                         | 100%                  | 0%             | n.a.              | n.a. | 66%   | n.a. | 45%                       | 25%             | U133A          | DMFS                  | 14%             |
