# Supplementary material
Source: PubMed Central journal article supplement (PMC5528573)
Supplement: MOL2-8-1196-s017.pdf [file MOL2-8-1196-s017.pdf]

**Supplementary Table S4: Relationship of individual dataset characteristics and the prognostic value of OPG within datasets**

| Dataset characteristics               | P-Value (Chi <sup>2</sup> test) * |
|---------------------------------------|-----------------------------------|
| samples with follow up                | 0.29                              |
| % high OPG                            | 0.38                              |
| type of adjuvant treatment            | 0.44                              |
| % without systemic therapy            | 0.74                              |
| % endocrine treatment                 | 0.82                              |
| % chemotherapy                        | 0.78                              |
| % Age up to 50 yr                     | 0.45                              |
| % T1                                  | 0.31                              |
| % LNN                                 | 0.90                              |
| % G3                                  | 0.45                              |
| % Luminal-B (Hugh et al.)             | 0.38                              |
| % PgR-negative                        | 0.29                              |
| Array platform (U133A vs U133Plus2.0) | 0.76                              |
| Outcome variable (DMFS vs. RFS)       | 0.58                              |
| % events at 5yr                       | 0.38                              |

\* P-Values of Chi<sup>2</sup> tests when comparing the respective parameter between the 7 datasets from Supplementary Table S3 in which a prognostic value of OPG was detected versus those 11 datasets in which no prognostic value of OPG could be detected.
