# Supplementary material
Source: PubMed Central journal article supplement (PMC5528573)
Supplement: MOL2-8-1196-s018.pdf [file MOL2-8-1196-s018.pdf]

Supplementary Table S5: Prognostic value of OPG and PgR in individual datasets (sort order according HR of OPG)

| dataset                | dataset pool | samples with follow up | OPG        |           |           |            |              |              |                   | Progesteron Receptor |         |           |            |              |              |                   |
|------------------------|--------------|------------------------|------------|-----------|-----------|------------|--------------|--------------|-------------------|----------------------|---------|-----------|------------|--------------|--------------|-------------------|
|                        |              |                        | n high opg | n low opg | % low OPG | HR Uni-Cox | 95% CI lower | 95% CI upper | P-Value           | PgR-pos              | PgR-neg | % PgR-neg | HR Uni-Cox | 95% CI lower | 95% CI upper | P-Value           |
| London                 | #1           | 85                     | 66         | 19        | 22%       | 0.26       | 0.11         | 0.62         | <b>0.003</b>      | 67                   | 18      | 21%       | 0.64       | 0.25         | 1.67         | 0.360             |
| Mainz                  | #1           | 164                    | 86         | 78        | 48%       | 0.34       | 0.15         | 0.78         | <b>0.010</b>      | 129                  | 35      | 21%       | 0.31       | 0.15         | 0.65         | <b>0.002</b>      |
| BIG1-98                | #1           | 52                     | 43         | 9         | 17%       | 0.39       | 0.10         | 1.52         | 0.175             | 41                   | 11      | 21%       | 0.54       | 0.14         | 2.09         | 0.369             |
| Rotterdam              | #1           | 208                    | 54         | 154       | 74%       | 0.47       | 0.25         | 0.86         | <b>0.015</b>      | 130                  | 78      | 38%       | 0.46       | 0.29         | 0.72         | <b>0.001</b>      |
| TransBIG               | #1           | 132                    | 70         | 62        | 47%       | 0.47       | 0.27         | 0.81         | <b>0.007</b>      | 110                  | 22      | 17%       | 0.58       | 0.31         | 1.12         | 0.103             |
| Oxford-Tamoxifen       | #1           | 106                    | 43         | 63        | 59%       | 0.48       | 0.21         | 1.08         | 0.075             | 80                   | 26      | 25%       | 0.48       | 0.23         | 1.04         | 0.061             |
| Veridex-Tam            | #1           | 135                    | 56         | 79        | 59%       | 0.53       | 0.19         | 1.47         | 0.220             | 98                   | 37      | 27%       | 0.54       | 0.21         | 1.40         | 0.205             |
| Stockholm              | #2           | 122                    | 28         | 94        | 77%       | 0.74       | 0.28         | 1.96         | 0.550             | 70                   | 52      | 43%       | 0.79       | 0.37         | 1.68         | 0.540             |
| San Francisco          | #2           | 78                     | 39         | 39        | 50%       | 0.77       | 0.36         | 1.64         | 0.500             | 53                   | 25      | 32%       | 1.18       | 0.52         | 2.70         | 0.696             |
| Uppsala                | #2           | 199                    | 42         | 157       | 79%       | 0.79       | 0.43         | 1.43         | 0.430             | 139                  | 60      | 30%       | 1.12       | 0.66         | 1.90         | 0.665             |
| IPC                    | #2           | 136                    | 87         | 49        | 36%       | 0.85       | 0.45         | 1.59         | 0.600             | 120                  | 16      | 12%       | 0.86       | 0.34         | 2.20         | 0.757             |
| Oxford-Untreated       | #2           | 45                     | 12         | 33        | 73%       | 0.86       | 0.23         | 3.13         | 0.820             | 34                   | 11      | 24%       | 0.64       | 0.19         | 2.13         | 0.468             |
| Boston_2               | #2           | 68                     | 53         | 15        | 22%       | 0.87       | 0.09         | 8.33         | 0.900             | 51                   | 17      | 25%       | 0.97       | 0.10         | 9.28         | 0.976             |
| IPC_HER2               | #2           | 10                     | 8          | 2         | 20%       | 0.90       | 0.09         | 9.09         | 0.930             | 5                    | 5       | 50%       | 0.14       | 0.01         | 1.41         | 0.095             |
| New York               | #2           | 45                     | 16         | 29        | 64%       | 0.93       | 0.28         | 3.13         | 0.910             | 27                   | 18      | 40%       | 2.28       | 0.62         | 8.44         | 0.217             |
| SET2                   | #2           | 183                    | 28         | 155       | 85%       | 1.02       | 0.45         | 2.27         | 0.970             | 106                  | 77      | 42%       | 0.73       | 0.40         | 1.32         | 0.290             |
| London-2               | #2           | 73                     | 35         | 38        | 52%       | 1.03       | 0.33         | 3.23         | 0.960             | 61                   | 12      | 16%       | 1.00       | 0.22         | 4.58         | 0.998             |
| SET1                   | #2           | 100                    | 41         | 59        | 59%       | 1.12       | 0.45         | 2.86         | 0.800             | 75                   | 25      | 25%       | 2.04       | 0.59         | 7.05         | 0.260             |
| <b>dataset pool #1</b> |              | 882                    | 418        | 464       | 53%       | 0.43       | 0.33         | 0.57         | <b>&lt; 0.001</b> | 655                  | 227     | 26%       | 0.47       | 0.36         | 0.61         | <b>&lt; 0.001</b> |
| <b>dataset pool #2</b> |              | 1059                   | 389        | 670       | 63%       | 0.88       | 0.69         | 1.14         | 0.341             | 741                  | 318     | 30%       | 1.02       | 0.79         | 1.32         | 0.898             |
| <b>All samples</b>     |              | 1941                   | 807        | 1134      | 58%       | 0.64       | 0.53         | 0.77         | <b>&lt; 0.001</b> | 1396                 | 545     | 28%       | 0.72       | 0.60         | 0.86         | <b>&lt; 0.001</b> |
