# Supplementary material
Source: PubMed Central journal article supplement (PMC5528573)
Supplement: MOL2-8-1196-s019.pdf [file MOL2-8-1196-s019.pdf]

**Supplementary Table S6:** Comparison of PgR status from microarray and biochemical IHC assay in dataset pools #1 and #2

|                                                                     | dataset pool #1 | dataset pool #2 |
|---------------------------------------------------------------------|-----------------|-----------------|
| No. of samples with PgR status available from biochemical/IHC assay | 335             | 606             |
| Accuracy                                                            | 78 %            | 78 %            |
| Sensitivity                                                         | 80 %            | 81 %            |
| Specificity                                                         | 71 %            | 58 %            |
| Positive predictive value (PPV)                                     | 90 %            | 91 %            |
| Negative predictive value (NPV)                                     | 51 %            | 38 %            |
