# Supplementary material
Source: PubMed Central journal article supplement (PMC5528573)
Supplement: MOL2-8-1196-s020.pdf [file MOL2-8-1196-s020.pdf]

**Supplementary Table S7: Comparison of patient characteristics from dataset pool #1 and pool #2**

| Parameter             |                | total |       | pool #1 |       | pool #2 |       | Odds Ratio | P-Value |
|-----------------------|----------------|-------|-------|---------|-------|---------|-------|------------|---------|
| Lymph node status     | LNN            | 1,267 | 70.7% | 751     | 85.7% | 516     | 56.3% | 4.67       | < 0.001 |
|                       | N+             | 526   | 29.3% | 125     | 14.3% | 401     | 43.7% |            |         |
| Age                   | Age > 50       | 969   | 69.2% | 508     | 68.0% | 461     | 70.6% | 0.89       | n.s.    |
|                       | Age ≤ 50       | 431   | 30.8% | 239     | 32.0% | 192     | 29.4% |            |         |
| Tumor size            | ≤ 2 cm         | 160   | 30.4% | 121     | 39.8% | 39      | 17.5% | 3.12       | < 0.001 |
|                       | > 2 cm         | 367   | 69.6% | 183     | 60.2% | 184     | 82.5% |            |         |
| Grade                 | G3             | 423   | 30.4% | 226     | 31.8% | 197     | 28.8% | 1.15       | n.s.    |
|                       | G1 & G2        | 970   | 69.6% | 484     | 68.2% | 486     | 71.2% |            |         |
| PgR status            | positive       | 1,396 | 71.9% | 655     | 74.3% | 741     | 70.0% | 1.24       | 0.038   |
|                       | negative       | 545   | 28.1% | 227     | 25.7% | 318     | 30.0% |            |         |
| HER2 status           | positive       | 124   | 6.4%  | 58      | 6.6%  | 66      | 6.2%  | 1.06       | n.s.    |
|                       | negative       | 1,817 | 93.6% | 824     | 93.4% | 993     | 93.8% |            |         |
| Subtype (Hugh et al.) | Luminal A      | 1,052 | 54.2% | 504     | 57.1% | 548     | 51.7% | 1.24       | 0.020   |
|                       | Luminal B      | 889   | 45.8% | 378     | 42.9% | 511     | 48.3% |            |         |
| Systemic treatment    | Untreated      | 686   | 39.7% | 504     | 57.1% | 182     | 21.5% | 4.87       | < 0.001 |
|                       | Endocrine Only | 913   | 52.8% | 359     | 40.7% | 554     | 65.4% |            |         |
|                       | Chemotherapy   | 130   | 7.5%  | 19      | 2.2%  | 111     | 13.1% |            |         |
| Outcome variable      | RFS            | 892   | 47.4% | 323     | 38.9% | 569     | 54.0% | 0.54       | < 0.001 |
|                       | DMFS           | 991   | 52.6% | 507     | 61.1% | 484     | 46.0% |            |         |
| OPG                   | low            | 1,134 | 58.4% | 464     | 52.6% | 670     | 63.3% | 0.64       | < 0.001 |
|                       | high           | 807   | 41.6% | 418     | 47.4% | 389     | 36.7% |            |         |
| Platform              | U133A          | 1,517 | 78.2% | 745     | 84.5% | 772     | 72.9% | 2.02       | < 0.001 |
|                       | U133Plus2.0    | 424   | 21.8% | 137     | 15.5% | 287     | 27.1% |            |         |
