# Supplementary material
Source: PubMed Central journal article supplement (PMC5528573)
Supplement: MOL2-8-1196-s021.pdf [file MOL2-8-1196-s021.pdf]

**Supplementary Table S8: Comparison of patient characteristics from the LNN subsets of dataset pool #1 and pool #2**

| Parameter             |                | total |       | pool #1 |       | pool #2 |       | Odds Ratio | P-Value |
|-----------------------|----------------|-------|-------|---------|-------|---------|-------|------------|---------|
| Age                   | Age > 50       | 643   | 66.6% | 381     | 61.9% | 262     | 74.9% | 1.23       | < 0.001 |
|                       | Age ≤ 50       | 323   | 33.4% | 235     | 38.1% | 88      | 25.1% |            |         |
| Tumor size            | ≤ 2 cm         | 151   | 37.6% | 121     | 39.8% | 30      | 30.6% | 0.91       | n.s.    |
|                       | > 2 cm         | 251   | 62.4% | 183     | 60.2% | 68      | 69.4% |            |         |
| Grade                 | G3             | 265   | 29.3% | 201     | 33.8% | 64      | 20.7% | 0.81       | < 0.001 |
|                       | G1 & G2        | 639   | 70.7% | 394     | 66.2% | 245     | 79.3% |            |         |
| PgR status            | positive       | 935   | 73.8% | 561     | 74.7% | 374     | 72.5% | 0.95       | n.s.    |
|                       | negative       | 332   | 26.2% | 190     | 25.3% | 142     | 27.5% |            |         |
| HER2 status           | positive       | 77    | 6.1%  | 54      | 7.2%  | 23      | 4.5%  | 0.84       | n.s.    |
|                       | negative       | 1,190 | 93.9% | 697     | 92.8% | 493     | 95.5% |            |         |
| Subtype (Hugh et al.) | Luminal A      | 707   | 55.8% | 412     | 54.9% | 295     | 57.2% | 1.04       | n.s.    |
|                       | Luminal B      | 560   | 44.2% | 339     | 45.1% | 221     | 42.8% |            |         |
| Systemic treatment    | Untreated      | 666   | 55.5% | 504     | 67.1% | 162     | 36.2% | 0.65       | < 0.001 |
|                       | Endocrine Only | 495   | 41.3% | 244     | 32.5% | 251     | 56.0% |            |         |
| Outcome variable      | RFS            | 488   | 39.3% | 224     | 30.6% | 264     | 51.8% | 1.47       | < 0.001 |
|                       | DMFS           | 753   | 60.7% | 507     | 69.4% | 246     | 48.2% |            |         |
| OPG                   | low            | 732   | 57.8% | 418     | 55.7% | 314     | 60.9% | 1.09       | n.s.    |
|                       | high           | 535   | 42.2% | 333     | 44.3% | 202     | 39.1% |            |         |
| Platform              | U133A          | 1,089 | 86.0% | 702     | 93.5% | 387     | 75.0% | 0.43       | < 0.001 |
|                       | U133Plus2.0    | 178   | 14.0% | 49      | 6.5%  | 129     | 25.0% |            |         |
