# Supplementary material
Source: PubMed Central journal article supplement (PMC5528573)
Supplement: MOL2-8-1196-s022.pdf [file MOL2-8-1196-s022.pdf]

**Supplementary Table S9: Prognostic value of PgR and OPG in the LNN subcohorts of individual datasets (sort order according HR of OPG within dataset pools)**

|               | dataset pool | OPG  |        |         |              | PgR    |         |       |              |
|---------------|--------------|------|--------|---------|--------------|--------|---------|-------|--------------|
|               |              | HR   | 95% CI | P-Value | HR           | 95% CI | P-Value |       |              |
| London        | #1           | 0.29 | 0.07   | 1.33    | 0.112        | 27.31  | <0.01   | >1000 | 0.447        |
| Oxford-Tam    | #1           | 0.32 | 0.10   | 0.98    | <b>0.045</b> | 0.30   | 0.10    | 0.86  | <b>0.025</b> |
| Mainz         | #1           | 0.35 | 0.15   | 0.78    | <b>0.010</b> | 0.31   | 0.15    | 0.64  | <b>0.002</b> |
| Rotterdam     | #1           | 0.47 | 0.25   | 0.86    | <b>0.015</b> | 0.46   | 0.29    | 0.71  | <b>0.001</b> |
| TransBIG      | #1           | 0.47 | 0.27   | 0.81    | <b>0.007</b> | 0.58   | 0.31    | 1.11  | 0.103        |
| Veridex-Tam   | #1           | 0.53 | 0.19   | 1.48    | 0.222        | 0.54   | 0.21    | 1.40  | 0.205        |
| BIG1-98       | #1           | 0.54 | 0.06   | 5.31    | 0.598        | 0.29   | 0.04    | 2.11  | 0.224        |
| Boston_2      | #2           | 0.00 | <0.01  | >1000   | 0.771        | 31.53  | <0.01   | >1000 | 0.725        |
| New York      | #2           | 0.03 | <0.01  | >1000   | 0.569        | 46.42  | <0.01   | >1000 | 0.521        |
| SET2          | #2           | 0.44 | 0.06   | 3.40    | 0.430        | 0.56   | 0.18    | 1.77  | 0.326        |
| San Francisco | #2           | 0.73 | 0.22   | 2.40    | 0.605        | 4.26   | 0.54    | 33.40 | 0.168        |
| Oxford-Untr   | #2           | 0.86 | 0.23   | 3.18    | 0.821        | 0.64   | 0.19    | 2.13  | 0.468        |
| London-2      | #2           | 1.26 | 0.11   | 14.02   | 0.850        | 33.53  | <0.01   | >1000 | 0.520        |
| Uppsala       | #2           | 1.38 | 0.70   | 2.71    | 0.353        | 1.09   | 0.53    | 2.23  | 0.816        |
| SET1          | #2           | 1.43 | 0.42   | 4.96    | 0.568        | 3.27   | 0.41    | 25.90 | 0.261        |
| IPC_HER2      | #2           | 2.44 | 0.70   | 8.52    | 0.163        | 22.39  | <0.01   | >1000 | 0.470        |
